# Supplementary material for: TRPML1 ion channel promote HepaRG cells differentiation under simulated microgravity conditions
Source: Research Square preprint supplement (doi:10.21203/rs.3.rs-3485339/v1), 2023-12-11
Supplement: Supplementary file 1 [file 05ee572d72ae4c53965483af.docx]

**Table S1.** Primers for quantitative RT-qPCR (human)

| Primers name |  | Primers sequences |
| --- | --- | --- |
| AFP-homo | F | AGACTGAAAACCCTCTTGAATGC |
| AFP-homo | R | GTCCTCACTGAGTTGGCAACA |
| ALB-homo | F | TTTATGCCCCGGAACTCCTTT |
| ALB-homo | R | AGTCTCTGTTTGGCAGACGAA |
| CK18-homo | F | TCGCAAATACTGTGGACAATGC |
| CK18-homo | R | GCAGTCGTGTGATATTGGTGT |
| TRPML1-homo | F | GACCATTAACCTCCAGAGCCTCA |
| TRPML1-homo | R | CGGACGACGCTGAAGGTATAGCAGTCCG |
| VAV14-homo | F | CAACGTGCTCTTTGACGGG |
| VAV14-homo | R | CTCTCGCAACAAGGGGATGAA |
| FAK-homo | F | AGTGGACCAGGAAATTGCTTTG |
| FAK-homo | R | GTGTTTTGGCCTTGACAGAATC |
| β-actin-homo | F | TCATCACCATEGCAATGA |
| β-actin-homo | R | CACTGTGTTGGCGTACAGG |
| VIM-homo | F | GACGCCATCAACACCGAGTT |
| VIM-homo | R | CTTTGTCGTTGGTTAGCTGGT |
| COL1A1-homo | F | GAGGGCCAAGACGAAGACATC |
| COL1A1-homo | R | CAGATCACGTCATCGCACAAC |
| FN1-homo | F | CGGTGGCTGTCAGTCAAAG |
| FN1-homo | R | AAACCTCGGCTTCCTCCATAA |
| α-SMA-homo | F | GTGACTACTGCCGAGCGTG |
| α-SMA-homo | R | ATAGGTGGTTTCGTGATGC |
