# Supplementary material for: TRPML1 ion channel promote HepaRG cells differentiation under simulated microgravity conditions
Source: Research Square preprint supplement (doi:10.21203/rs.3.rs-3485339/v1), 2023-12-11
Supplement: Supplementary file 2 [file 0d7a8f38a636d20ad77a4501.docx]

**Table S2.** RNAi oligonucleotide sequences targeting human *TRPML1* gene.

| Primers name | Primers sequences |
| --- | --- |
| shTRPML1-1 | 5’-GCTACCTGACCTTCTTCCACA-3’ |
| shTRPML1-2 | 5’-GCATTCGCTGCTGGTGAATTG-3’ |
| shTRPML1-3 | 5’-GCTGGTGAATTGATTCGACCT-3’ |
